# Supplementary material for: A high power density paper-based zinc–air battery with a hollow channel structure
Source: Royal Society of Chemistry journal article supplement (doi:10.1039/d0cc07687b), 2020-12-24
Supplement: d0cc07687b1.pdf [file d0cc07687b1.pdf]

## Electronic Supplementary Information (ESI)

### High Power Density of Paper-Based Zinc-Air Battery with Hollow Channel Structure

Haoran Zhang<sup>a,b</sup>, Biao Zhang<sup>a,b</sup>, Yang Yang<sup>a,b\*</sup>, Dingding Ye<sup>a,b\*</sup>, Rong Chen<sup>a,b</sup>, Qiang Liao<sup>a,b</sup>, Xun Zhu<sup>a,b\*</sup>

<sup>a</sup>Ministry of Education Key Laboratory of Low-grade Energy Utilization Technologies and Systems (Chongqing University), Chongqing 400030, China

<sup>b</sup>Institute of Engineering Thermophysics, Chongqing University, Chongqing 400030, China

§ Yang Yang, Ph.D., Corresponding author

E-mail: [yang\\_yang@nwpu.edu.cn](mailto:yang_yang@nwpu.edu.cn)

Address: Institute of Engineering Thermophysics, Chongqing University, Chongqing 400030, China

Tel/Tax: +86-23-6510-2474

## Materials and Method

**Hollow Channel Fabrication.** The chromatographic paper is commercially available and purchased from Whatman (Type: CAT.No.3001-887). Hollow channel layers were fabricated using a previously reported wax patterning method. The devices were designed using CorelDrawX6 software. Patterns were printed on Whatman chromatographic paper using a Xerox Colorqube8570 inkjet wax printer. The paper was then placed in an oven at 150 °C for 15 minutes and cool at room temperature. Until it was cooled, it was cut into 45 mm in length, 35 mm in width, cut with a hollow structure of size of 35 mm in length, 4 mm in width in the middle serving as the hollow channel.

**Electrode Reaction.** The electrochemical reactions at the anode and cathode sides in alkaline solution were showed as following (Eq. S1-Eq. S4).

Anode side:

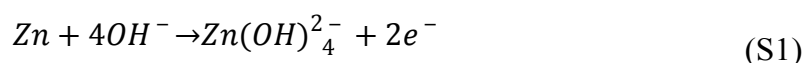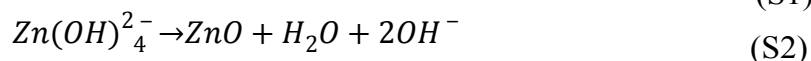

Cathode side:

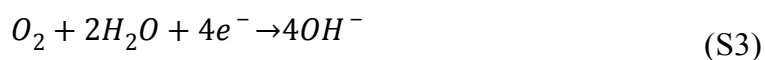

Overall reaction:

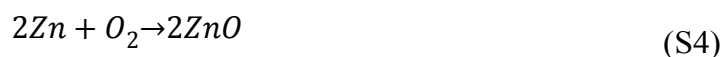

**ECSA Calculation.** The ECSA can be estimated from  $C_{dl}$  resulting from the linear relationship, as showed in the following equation (Eq. S5):

$$\text{ECSA} = C_{dl} \text{ of catalyst (mF)} / A \text{ (mF cm}^{-2}\text{)} \quad (\text{S5})$$

$A$  means the specific capacitance of 1 cm<sup>2</sup> flat surface area, and a constant value determined by the material property (typically is 40 μF cm<sup>-2</sup>).

## Supplementary Figures

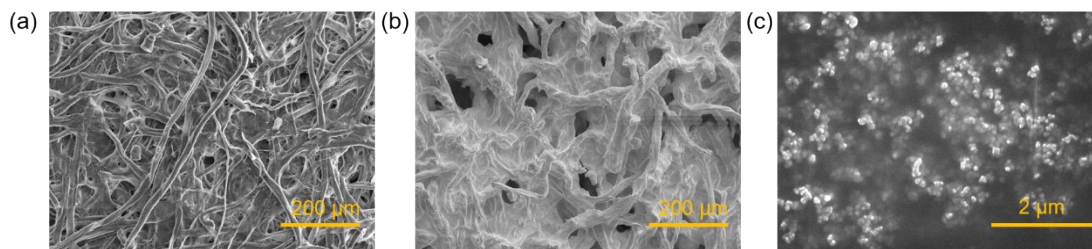

Fig.S1 Microscopic morphologies: (a) pristine filter paper; (b) KOH-saturated filter paper; (c) Pt/C air-cathode.

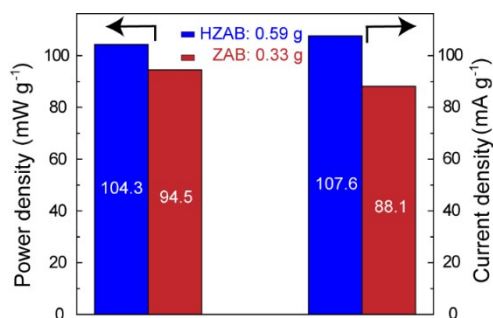

Fig.S2 Comparison of ZAB and HZAB in maximum power density and current density per unit weight.

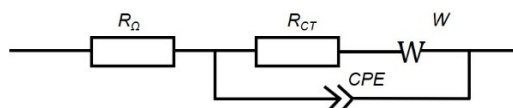

Fig.S3 Schematic of equivalent circuit to fit the Nyquist plots. Abbreviations:  $R_{\Omega}$ —ohmic resistance; CPE—constant phase element associated to the double layer at the surface of electrode;  $R_{CT}$ —charge transfer resistance;  $W$ —Warburg resistance.

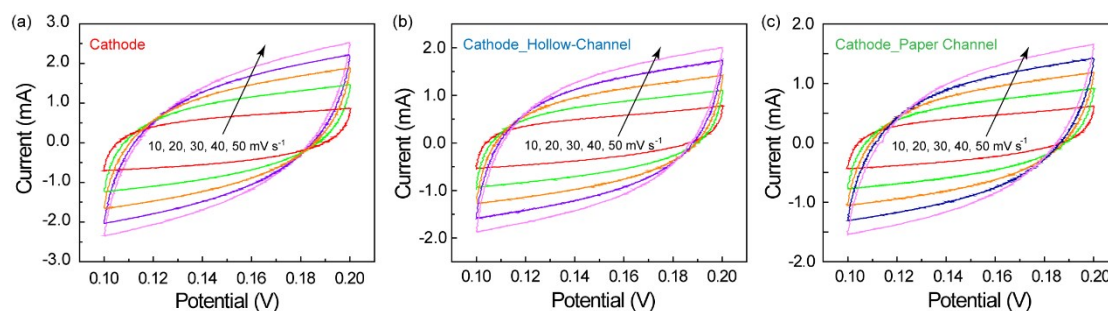

Fig.S4 CV curves: (a) Cathode, (b) Cathode\_Hollow-Channel and (c) Cathode\_Paper Channel collected at different scan rates over a potential range of 0.1 to 0.2 V.

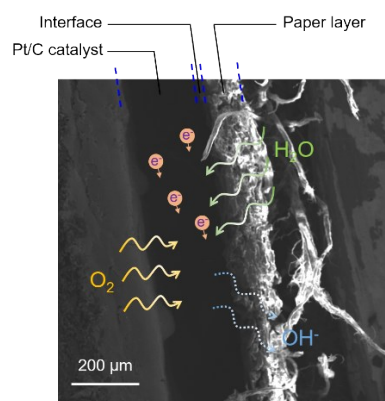

Fig.S5 Schematic illustration of the interface between the catalytic layer and paper fibers.

## Supplementary Tables

Table S1 Fitted parameters of some elements in the equivalent circuit.

|             | $R_{\Omega}$ | $R_{CT}$ | $W-R$ | $W-T$ | $W-P$ | $CPE-T$ | $CPE-P$ |
|-------------|--------------|----------|-------|-------|-------|---------|---------|
| <b>ZAB</b>  | 3.57         | 1.1      | 62.0  | 4.68  | 0.57  | 0.0024  | 0.78    |
| <b>HZAB</b> | 4.06         | 0.8      | 33.0  | 1.71  | 0.57  | 0.0002  | 0.91    |
